# Supplementary material for: Ferrocene analogues of sandwich M(CrB6H6)2: a theoretical investigation
Source: Royal Society of Chemistry journal article supplement (doi:10.1039/c4dt01106f), 2014-01-01
Supplement: c4dt01106f1.pdf [file c4dt01106f1.pdf]

## Supporting Information

### Ferrocene Analogues of Sandwich $M(\text{CrB}_6\text{H}_6)_2$ : A Theoretical Investigation

**by**

Lifen Li, Chang Xu, Baokang Jin and Longjiu Cheng\*

Department of Chemistry, Anhui University,

Hefei, Anhui, 230039, People's Republic of China

E-mail: [clj@ustc.edu](mailto:clj@ustc.edu)

---

\* Corresponding author. Email: [clj@ustc.edu](mailto:clj@ustc.edu)

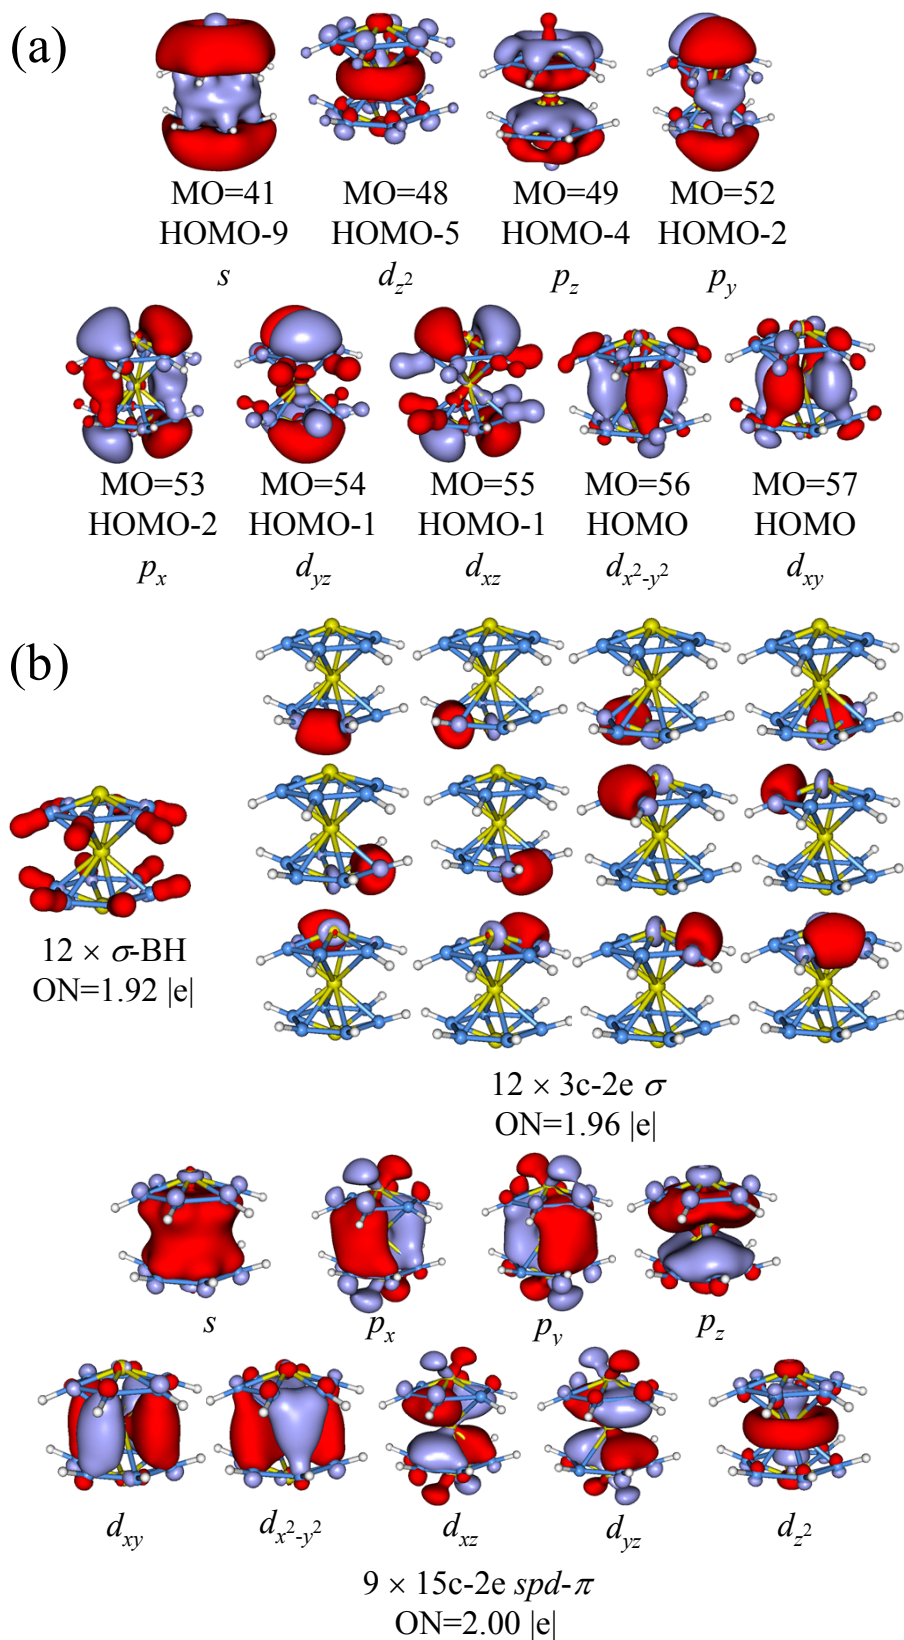

**Figure S1.** (a) Partial canonical molecular orbitals and (b) AdNDP localized bonding patterns of  $[\text{Mn}(\text{CrB}_6\text{H}_6)_2]^+$ .

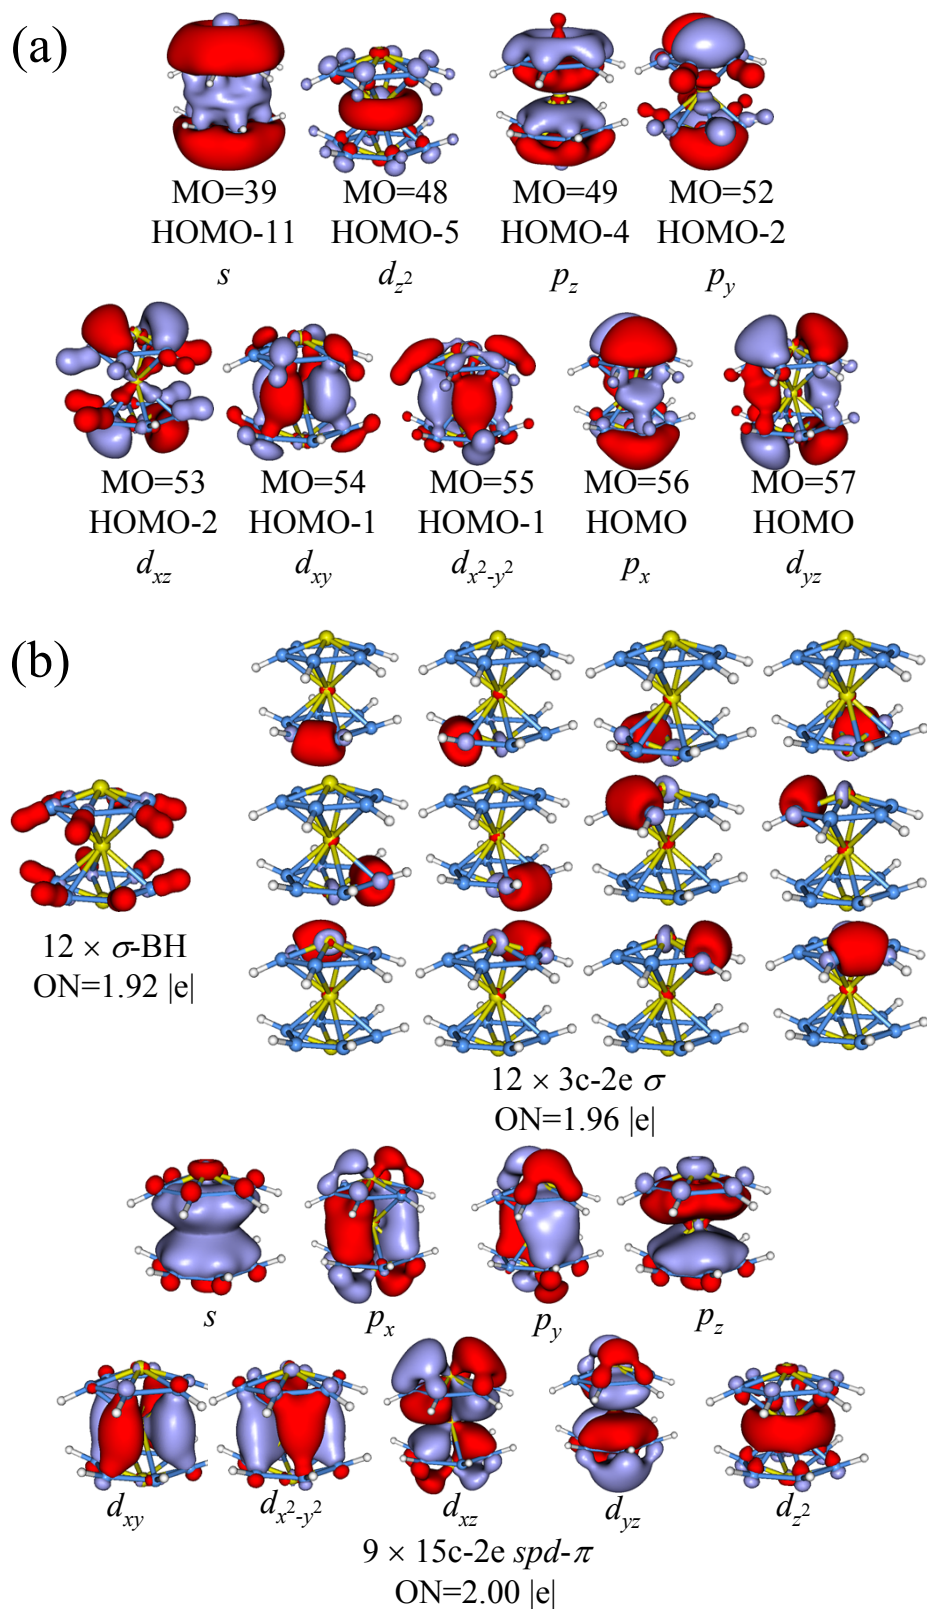

**Figure S2.** (a) Partial canonical molecular orbitals and (b) AdNDP localized bonding patterns of  $[\text{Fe}(\text{CrB}_6\text{H}_6)_2]^{2+}$ .

Coordinates of  $M(\text{CrB}_6\text{H}_6)_2$  ( $M = \text{Cr}, \text{Mn}^+, \text{Fe}^{2+}$ ) (in angstrom):

Cr(CrB<sub>6</sub>H<sub>6</sub>)<sub>2</sub>

|    |           |           |           |
|----|-----------|-----------|-----------|
| Cr | 0.000000  | 0.000000  | 2.153838  |
| B  | 0.000000  | 1.834798  | 1.524821  |
| B  | -1.588982 | 0.917399  | 1.524821  |
| B  | -1.588982 | -0.917399 | 1.524821  |
| B  | 0.000000  | -1.834798 | 1.524821  |
| B  | 1.588982  | -0.917399 | 1.524821  |
| B  | 1.588982  | 0.917399  | 1.524821  |
| H  | 0.000000  | 2.966923  | 1.177759  |
| H  | -2.569431 | 1.483461  | 1.177759  |
| H  | -2.569431 | -1.483461 | 1.177759  |
| H  | 0.000000  | -2.966923 | 1.177759  |
| H  | 2.569431  | -1.483461 | 1.177759  |
| H  | 2.569431  | 1.483461  | 1.177759  |
| Cr | 0.000000  | 0.000000  | 0.000000  |
| Cr | 0.000000  | 0.000000  | -2.153838 |
| B  | -0.917399 | 1.588982  | -1.524821 |
| B  | -1.834798 | 0.000000  | -1.524821 |
| B  | -0.917399 | -1.588982 | -1.524821 |
| B  | 0.917399  | -1.588982 | -1.524821 |
| B  | 1.834798  | 0.000000  | -1.524821 |
| B  | 0.917399  | 1.588982  | -1.524821 |
| H  | -1.483461 | 2.569431  | -1.177759 |
| H  | -2.966923 | 0.000000  | -1.177759 |
| H  | -1.483461 | -2.569431 | -1.177759 |
| H  | 1.483461  | -2.569431 | -1.177759 |
| H  | 2.966923  | 0.000000  | -1.177759 |
| H  | 1.483461  | 2.569431  | -1.177759 |

[Mn(CrB<sub>6</sub>H<sub>6</sub>)<sub>2</sub>]<sup>+</sup>

|    |           |           |          |
|----|-----------|-----------|----------|
| Cr | 0.000000  | 0.000000  | 2.139356 |
| B  | 0.000000  | 1.840842  | 1.540099 |
| B  | -1.594216 | 0.920421  | 1.540099 |
| B  | -1.594216 | -0.920421 | 1.540099 |
| B  | 0.000000  | -1.840842 | 1.540099 |
| B  | 1.594216  | -0.920421 | 1.540099 |
| B  | 1.594216  | 0.920421  | 1.540099 |
| H  | 0.000000  | 2.955466  | 1.146528 |
| H  | -2.559508 | 1.477733  | 1.146528 |
| H  | -2.559508 | -1.477733 | 1.146528 |
| H  | 0.000000  | -2.955466 | 1.146528 |
| H  | 2.559508  | -1.477733 | 1.146528 |
| H  | 2.559508  | 1.477733  | 1.146528 |

|                                                                    |           |           |           |
|--------------------------------------------------------------------|-----------|-----------|-----------|
| Mn                                                                 | 0.000000  | 0.000000  | 0.000000  |
| Cr                                                                 | 0.000000  | 0.000000  | -2.139356 |
| B                                                                  | -0.920421 | 1.594216  | -1.540099 |
| B                                                                  | -1.840842 | 0.000000  | -1.540099 |
| B                                                                  | -0.920421 | -1.594216 | -1.540099 |
| B                                                                  | 0.920421  | -1.594216 | -1.540099 |
| B                                                                  | 1.840842  | 0.000000  | -1.540099 |
| B                                                                  | 0.920421  | 1.594216  | -1.540099 |
| H                                                                  | -1.477733 | 2.559508  | -1.146528 |
| H                                                                  | -2.955466 | 0.000000  | -1.146528 |
| H                                                                  | -1.477733 | -2.559508 | -1.146528 |
| H                                                                  | 1.477733  | -2.559508 | -1.146528 |
| H                                                                  | 2.955466  | 0.000000  | -1.146528 |
| H                                                                  | 1.477733  | 2.559508  | -1.146528 |
| <u>[Fe(CrB<sub>6</sub>H<sub>6</sub>)<sub>2</sub>]<sup>2+</sup></u> |           |           |           |
| Cr                                                                 | 0.000000  | 0.000000  | 2.159098  |
| B                                                                  | 0.000000  | 1.850757  | 1.573630  |
| B                                                                  | -1.602802 | 0.925378  | 1.573630  |
| B                                                                  | -1.602802 | -0.925378 | 1.573630  |
| B                                                                  | 0.000000  | -1.850757 | 1.573630  |
| B                                                                  | 1.602802  | -0.925378 | 1.573630  |
| B                                                                  | 1.602802  | 0.925378  | 1.573630  |
| H                                                                  | 0.000000  | 2.951246  | 1.142094  |
| H                                                                  | -2.555854 | 1.475623  | 1.142094  |
| H                                                                  | -2.555854 | -1.475623 | 1.142094  |
| H                                                                  | 0.000000  | -2.951246 | 1.142094  |
| H                                                                  | 2.555854  | -1.475623 | 1.142094  |
| H                                                                  | 2.555854  | 1.475623  | 1.142094  |
| Fe                                                                 | 0.000000  | 0.000000  | 0.000000  |
| Cr                                                                 | 0.000000  | 0.000000  | -2.159098 |
| B                                                                  | -0.925378 | 1.602802  | -1.573630 |
| B                                                                  | -1.850757 | 0.000000  | -1.573630 |
| B                                                                  | -0.925378 | -1.602802 | -1.573630 |
| B                                                                  | 0.925378  | -1.602802 | -1.573630 |
| B                                                                  | 1.850757  | 0.000000  | -1.573630 |
| B                                                                  | 0.925378  | 1.602802  | -1.573630 |
| H                                                                  | -1.475623 | 2.555854  | -1.142094 |
| H                                                                  | -2.951246 | 0.000000  | -1.142094 |
| H                                                                  | -1.475623 | -2.555854 | -1.142094 |
| H                                                                  | 1.475623  | -2.555854 | -1.142094 |
| H                                                                  | 2.951246  | 0.000000  | -1.142094 |
| H                                                                  | 1.475623  | 2.555854  | -1.142094 |
